# Supplementary material for: The DYW Subgroup PPR Protein MEF35 Targets RNA Editing Sites in the Mitochondrial rpl16, nad4 and cob mRNAs in Arabidopsis thaliana
Source: PubMed Central journal article supplement (PMC4607164; doi:10.1371/journal.pone.0140680), 2015-10-15
Supplement: pone.0140680.s002.pdf [file pone.0140680.s002.pdf]

| gene         | editing site | Col | <i>morf1-1</i> | <i>morf3-1</i> | <i>morf4-1</i> | <i>morf5-1</i> | <i>morf6-1</i> |
|--------------|--------------|-----|----------------|----------------|----------------|----------------|----------------|
| <i>cob</i>   | 286          | 98  | 96             | 97             | 96             | 99             | 98             |
| <i>rpl16</i> | 209          | 99  | 94             | 99             | 96             | 100            | 99             |
| <i>nad4</i>  | 1373         | 92  | 92             | 92             | 99             |                | 99             |

**Fig S2 Editing at the MEF35 target sites is not affected in mutants of five mitochondrial MORF proteins.** Percentages of RNA editing at the target sites are shown as determined by direct sequence analysis. As this experimental approach does allow to not distinguish between a background of up to 10% and genuine effects, values above 90% have to be considered as full editing. These data are experimentally determined from the mutant lines *morf1-1* EMS mutant, *morf3-1* (GK-109E12.01), *morf4-1* (SAIL\_731\_D08), *morf5-1* (SALK\_016801C), *morf6-1* (GK-184F04.01).
